# Supplementary material for: Efficiency enhancement of top-illuminated ITO-free organic solar cells using plasmonic-assisted nanostructured reflective electrodes
Source: Royal Society of Chemistry journal article supplement (doi:10.1039/c5tc01462j), 2015-01-01
Supplement: c5tc01462j1.pdf [file c5tc01462j1.pdf]

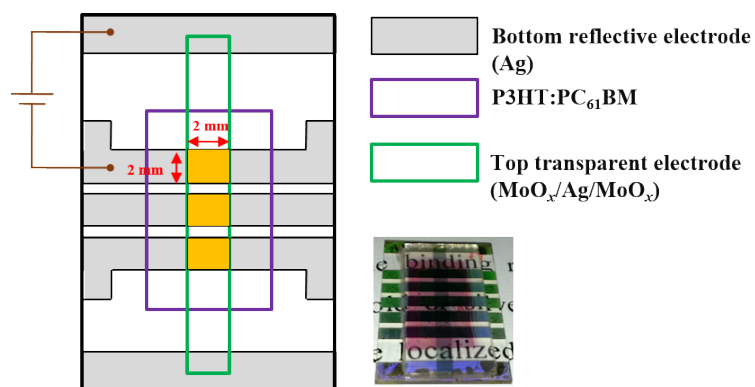

**Fig. S1** Schematic diagram of device pattern (The inset shows a photograph of a fabricated device with the nanostructured rear electrode which clearly reveals light scattering/deflection). The gray finger grid denotes the bottom reflective electrode. The purple, green and orange region indicates the P3HT:PC<sub>61</sub>BM layer, the top transparent contact and the active area (2×2 mm<sup>2</sup>), respectively.

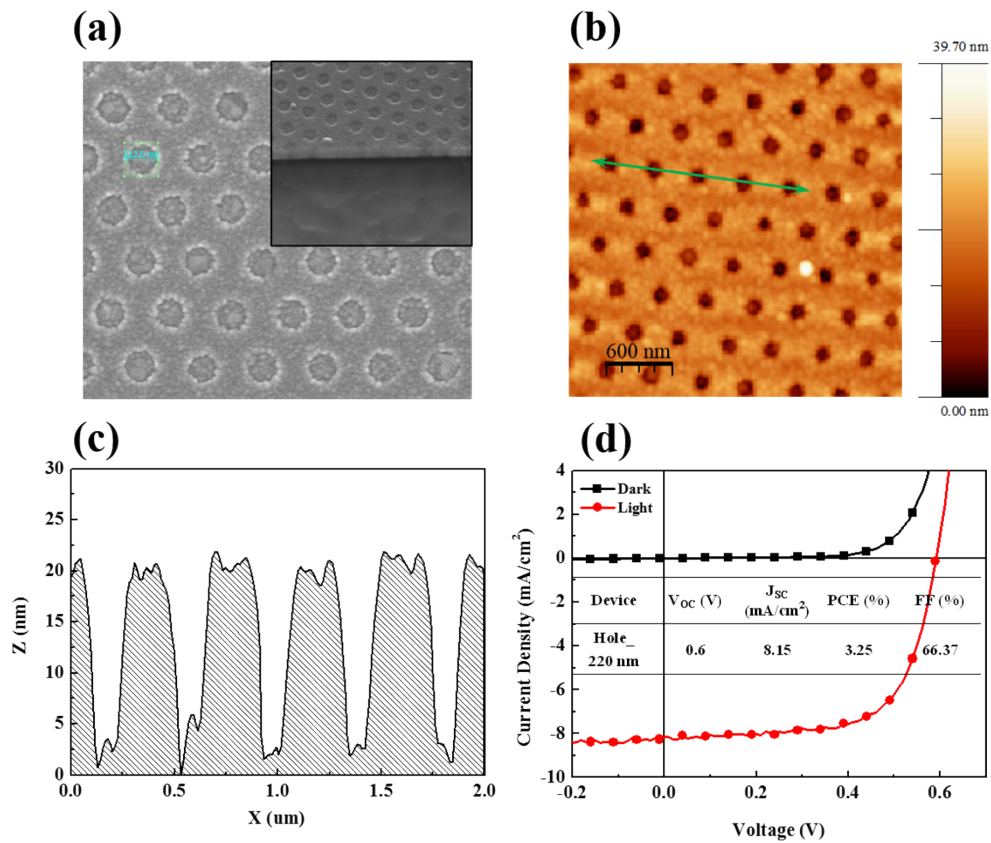

**Fig. S2** (a) Top-view and 52° tilted SEM images and (b) AFM topography image and (c) the height profile, along with the indicated green line in Fig. S2(b) of rear Ag electrode with 220 nm wide and 20 nm deep holes. (d)  $J$ - $V$  characteristics of OPVs with the corresponding rear electrode.
